## 1 **Engraftment of allotransplanted tumour cells in adult *rag2* mutant *Xenopus tropicalis***

2 Dieter Tulkens (1,2), Dionysia Dimitrakopoulou (1), Tom Van Nieuwenhuysen (1), Marthe Boelens (1),  
3 Suzan Demuyck (1), Wendy Toussaint (1,3), David Creyten (2, 4), Pieter Van Vlierberghe (2,5) & Kris  
4 Vleminckx (1,2)

5  
6 (1) Department of Biomedical Molecular Biology, Ghent University, Ghent, Belgium

7 (2) Cancer Research Institute Ghent (CRIG), Ghent, Belgium

8 (3) Laboratory of Myeloid Cell Ontogeny and Functional Specialization, VIB-UGent Center for  
9 inflammation Research, Ghent, Belgium

10 (4) Department of Pathology, Ghent University and Ghent University Hospital, Ghent, Belgium

11 (5) Department of Biomolecular Medicine, Ghent University, Ghent, Belgium

12

### 13 **Abstract**

14 Modelling human genetic diseases and cancer in lab animals has been greatly aided by the emergence  
15 of genetic engineering tools such as TALENs and CRISPR/Cas9. We have previously demonstrated the  
16 ease with which genetically engineered *Xenopus* models (GEXM) can be generated. This included the  
17 induction of autochthonous tumour formation by injection of early embryos with Cas9 recombinant  
18 protein loaded with sgRNAs targeting multiple tumour suppressor genes. What has been lacking so far  
19 is the possibility to propagate the induced cancers via transplantation. In this paper we describe the  
20 generation of a *rag2*<sup>-/-</sup> knock-out line in *Xenopus tropicalis* that is deficient in functional T- and B-cells.  
21 This line was validated by means of an allografting experiment with a primary *tp53*<sup>-/-</sup> donor tumour. In  
22 addition, we optimized available protocols for sub-lethal gamma irradiation of *X. tropicalis* froglets.  
23 Irradiated animals also allowed stable, albeit transient, engraftment of transplanted *tp53*<sup>-/-</sup> tumour  
24 cells. The novel *X. tropicalis rag2*<sup>-/-</sup> line and the irradiated wild type froglets will further expand the  
25 experimental toolbox in this diploid amphibian, and help to establish it as a versatile and relevant  
26 model for exploring human cancer.

27

### 28 **Introduction**

29 The earliest transplantation of human primary tumour cells in mammalian hosts was described by Dr.  
30 Harry S. N. Greene (1938). Gradually during the last decades, tumour transplantation has been  
31 recognized as an indispensable tool in the cancer research field and has been successfully performed  
32 not only in mammalian species such as mice [reviewed by Sharkey & Fogh (1984)] but also in non-  
33 mammalian vertebrates like zebrafish [reviewed by Gansner et al. (2017)]. Cancer immunoediting, and  
34 more specifically cancer immunosurveillance, is an important process that can severely hamper

35 engraftment of tumours in immunocompetent hosts (Dunn et al., 2002). In order to escape from this  
36 phenomenon either inbred or immunodeficient animals are required, thus allowing stable tumour  
37 progression after transplantation. Researchers working with mice were able to generate, amongst  
38 others, the ‘nude mice’ (lacking the thymus and thus functional T-cells), the NOD-SCID and SCID-beige  
39 mice that are deficient in both the T- and B-cell pool, and finally the NSG or NOG mice that additionally  
40 lack functional NK cells (Yoshida, 2020). More recently zebrafish have joined the field. Several protocols  
41 and resources are available in this species to achieve stable engraftment of transplanted cells such as  
42 for example sub-lethal irradiation (Traver et al., 2004), the use of a *rag2*<sup>E450fs</sup> immunocompromised  
43 animals (Tang et al., 2014) and the use of syngeneic zebrafish lines, e.g. the CG1-strain (Smith et al.,  
44 2010). Furthermore, for xenograft experiments this species holds great promise as the transparent  
45 *casper* strain allowed the tracing and functional characterization of fluorescently labelled human  
46 tumour cells (White et al., 2008). Most recently the Langenau lab generated adult *prkdc*<sup>-/-</sup>, *il2rgα*<sup>-/-</sup>  
47 immunocompromised zebrafish in the *casper*-strain that allowed robust engraftment of human cancer  
48 cells (Yan et al., 2020).

49 *Xenopus*, like zebrafish enjoys transparency in embryonic stages, allowing tracing of fluorescently  
50 labelled cells. Besides, the *Xenopus* innate and adaptive immune cells and mechanisms show high  
51 conservation with their respective mammalian counterparts (Banach & Robert, 2017). Despite the  
52 emergence of *Xenopus tropicalis* as a cancer model, thanks to the ease with which genetically  
53 engineered *Xenopus* models (GEXM) can be generated, so far experiments with tumour  
54 transplantations have not been documented for this species. Transplantations of *X. laevis* *ff-2*  
55 lymphoid tumour cells in inbred MHC homozygous *ff X. laevis* animals have led to the interesting  
56 finding that grafts are accepted in transplanted tadpoles but rejection is present in transplanted adults  
57 (Robert et al., 1995, 1997). This phenomenon is believed to be due to the second histogenesis present  
58 in the thymus during and after metamorphosis (Robert et al., 1995, 1997). Recently, Rollins-Smith &  
59 Robert (2019) described a protocol to induce lymphocyte deficiency by subjecting *X. laevis* frogs to  
60 sub-lethal gamma irradiation. Another study (Rau et al., 2001) showed engraftment successes after  
61 transplanting the 15/0 lymphoid tumour line (from a spontaneous *X. laevis* thymoma) in *X. laevis*  
62 irradiated hosts. We describe here the generation and validation of a novel immunodeficient *rag2*<sup>-/-</sup> *X.*  
63 *tropicalis* line, suitable for transplantation experiments. Furthermore, we optimized and validated  
64 current available protocols for transplanting primary *Xenopus* tumours, for the first time, in irradiated  
65 *X. tropicalis* hosts. We believe these robust tools will be of high value for *Xenopus* tumour  
66 transplantation experiments and tumour immunity studies in general.

67

## 68 **Results**

### 69 **Generation of *rag2*<sup>-/-</sup> line**

70 In order to generate a *X. tropicalis rag2*<sup>-/-</sup> line, an sgRNA was designed targeting the first fifth of the  
71 *rag2* single exon gene. Wild type embryos were injected with a mixture of the selected sgRNA and Cas9  
72 recombinant protein (Fig. 1A). To analyse editing efficiency, stage NF 41 embryos were lysed and  
73 genotyped. Amplicon deep sequencing (MiSeq™ System – Illumina) of the targeted region in the *rag2*  
74 gene revealed a major inclusion of a 4 bp deletion, which is in correspondence with what is predicted  
75 by the inDelphi CRISPR repair outcome prediction algorithm (Shen et al., 2018). Correlation analysis  
76 revealed a significant high overall correlation between predicted and endogenously observed  
77 frequencies of variant calls (Pearson  $r = 0.9886$ ,  $p < 0.0001$ ) (Fig. 1B) confirming previous findings  
78 proposing inDelphi as suitable method for predicting CRISPR/Cas9 induced repair outcomes in *X.*  
79 *tropicalis* (Naert, Tulkens, et al., 2020). For obtaining homozygotes (see schematic Fig. 1A), first,  
80 crispant mosaic mutant animals were raised until adulthood, outcrossed with wild type animals and  
81 checked for germline transmission in the progeny. Heterozygote *rag2*<sup>+/<sup>mut</sup> animals were subsequently  
82 intercrossed and homozygote *rag2*<sup>mut/mut</sup> animals were selected using a mixed Heteroduplex Mobility  
83 Assay (mHMA) genotyping technique (Foster et al., 2019) (Fig. 1C top). Sanger sequencing confirmed  
84 biallelic presence of a 4 bp deletion in homozygous mutant animals (Fig. 1C bottom). This deletion  
85 induces a frameshift after amino acid 91 resulting in a non-functional protein. Therefore, these animals  
86 are further referred to as *rag2*<sup>-/-</sup>.</sup>

87

#### 88 **Transplantation of *X. tropicalis tp53*<sup>-/-</sup> tumour in an *X. tropicalis rag2*<sup>-/-</sup> adult**

89 To assess transplantation potential in the novel *rag2*<sup>-/-</sup> line, a thymic tumour originating from an adult  
90 *tp53*<sup>-/-</sup> animal from a previous study (Naert, Dimitrakopoulou, et al., 2020) was isolated (Fig. 2A). Two  
91 parallel transplantations were performed: 5x10<sup>6</sup> tumour single cells were transplanted  
92 intraperitoneally (IP) in a *rag2*<sup>-/-</sup> and a wild type adult as illustrated in Fig. 2B. Ten weeks post  
93 transplantation the *rag2*<sup>-/-</sup> transplanted animal showed obvious signs of lethargy, while the  
94 transplanted wild type showed no signs of discomfort. A clear externally visible outgrowth was present  
95 in the *rag2*<sup>-/-</sup> animal close to the transplantation injection site (Fig. 2C). Upon dissection multiple sites  
96 of engraftment were observed on the abdominal muscle wall and in the peritoneal cavity (Fig. 2D).  
97 Histopathological analysis of the tumours revealed presence of both epithelial and mesenchymal cell  
98 clusters, thereby showing morphological similarities to the donor tumour (Fig. 2E, top). Interestingly,  
99 multiple zones with neovascularization were present in these tumour engraftment sites (Fig. 2E, top).  
100 In addition, immunohistochemistry showed high proliferative capacity in both donor and engrafted  
101 tumours as indicated by PCNA immunostaining (Fig. 2E, bottom). Finally, the in-house developed mixed  
102 HMA method confirmed the inclusion of the same *tp53* mutational variant, present in both the donor  
103 and the engrafted tumour (Fig. 2F). These data show that adult *rag2*<sup>-/-</sup> knock-out *X. tropicalis* allows  
104 stable allografting of transplanted GEXM-derived tumour cells.

105

## 106 **Transplantation validation in irradiated *X. tropicalis* animals**

107 Efficient tumour cell transplantation might also be achieved via alternative techniques apart from the  
108 generation of a *rag2*<sup>-/-</sup> line. Immunocompromised *X. laevis* animals can also be obtained by sub-lethal  
109 gamma irradiation (Rollins-Smith & Robert, 2019). In order to generate such hosts in *X. tropicalis*, an  
110 optimal dose suitable for successful allografting of tumour cells needed to be determined. We  
111 irradiated 3 different groups of 4-month-old froglets [8 Gy (n=3), 10 Gy (n=3) and 12 Gy (n=3)] and  
112 compared these with a non-irradiated wild type group (n=6) (Fig. 3A). Approximately one week post  
113 irradiation all cohorts were euthanized and dissected. Major lymphoid organs (spleen and liver) and  
114 peripheral blood were checked to address irradiation potential. Natt and Herrick peripheral whole  
115 blood staining revealed significant reduction in white blood cell (WBC)/red blood cell (RBC) ratios in  
116 irradiated animals as compared to the non-irradiated controls ( $p = 0.0012$ ) (Fig. 3B). Of note, no  
117 significant differences were present between the 3 irradiated groups. Furthermore, quantification of  
118 CD3 immunohistochemical stainings revealed that irradiation majorly impacted T-cell levels in both  
119 spleens and livers (Fig. 3C-D). For spleens, compared to the wild types ( $51.9\% \pm 4.5$ ), irradiation with  
120 an 8 Gy dose already induced a significant decrease in CD3 positivity ( $36.0\% \pm 5.9$ ,  $p < 0.05$ ). This effect  
121 became more pronounced when irradiating to 10 Gy ( $15.7\% \pm 2.1$ ,  $p < 0.001$ ) and to 12 Gy ( $4.9\% \pm 1.9$ ,  
122  $p < 0.0001$ ). Additionally, in the livers a similar dose-ratio trend was observed [wild type ( $4.0\% \pm 1.8$ ),  
123 8 Gy ( $1.5\% \pm 0.5$ ,  $p = 0.08$ ), 10 Gy ( $0.4\% \pm 0.1$ ,  $p < 0.05$ ) and 12 Gy ( $0.2\% \pm 0.1$ ,  $p < 0.05$ )]. We propose  
124 irradiation up to a dose of 12 Gy is preferred for optimal reduction of T-cell numbers, thereby  
125 displaying the highest potential for successful tumour transplantation applications.

126 In parallel with the experiment in *rag2*<sup>-/-</sup> animals, we validated the transplantation potential of *tp53*-  
127 mutant GEXM tumour cells also in an irradiated animal. For this purpose, an irradiated froglet (12 Gy)  
128 and a wild type sibling were injected intraperitoneally with  $1 \times 10^7$  live tumour cells. To avoid any risk of  
129 repopulation of functional immune cells after the irradiation procedure, the froglets were analysed  
130 already 3 weeks post transplantation, in absence of any external signs indicative for engraftment. A  
131 clear increase of tumour cells circulating in the peritoneal cavity was observed in the irradiated  
132 transplant (non-RBC/RBC =  $66.7\% \pm 5.7$ ) as compared to the non-irradiated transplanted control (non-  
133 RBC/RBC =  $13.9\% \pm 2.3$ ), where the non-RBC fraction (in the irradiated transplant) was majorly  
134 represented by tumour blast cells (Fig. 3E). Furthermore, in-depth histological analysis revealed  
135 tumour engraftment in both the kidney and the liver of the irradiated transplanted animal, whereas  
136 the wild type transplanted control did not show any signs of engraftment (Fig. 3F). Similar to what was  
137 found for the *rag2*<sup>-/-</sup> animal, also tumour grafts observed in the irradiated transplant showed high  
138 proliferative capacity as indicated by PCNA immunostaining (Fig. 3G).

139

140 **Discussion**

141 Donor cell rejection by the host organism after (allo)transplantation is a common hurdle, jeopardizing  
142 *bona fide* assessment of engraftment potential of tumour cells. In absence of syngeneic models, the  
143 availability of immunocompromised animals is an absolute need to show evidence of engraftment  
144 after transplantation and to allow further phenotypic analysis of cancerous cells.

145 We describe the generation of the novel *X. tropicalis rag2<sup>-/-</sup>* line as a beneficial tool for transplantation  
146 experiments. Due to the central role of the Rag2 protein in the process of V(D)J recombination, these  
147 animals should lack mature T- and B-cells. Similar to what has been shown in zebrafish (Tang et al.,  
148 2014) also the *X. tropicalis rag2<sup>-/-</sup>* animal used in this study allowed allografting of primary tumour  
149 donor cells injected intraperitoneally. Especially for longer incubations and serial tumour  
150 transplantations this line is recommended over irradiated animals where the transient nature of the  
151 immunosuppression might eventually hamper stable engraftment. Already 10 weeks post  
152 transplantation solid tumour grafts were visible at the injection site in the *rag2<sup>-/-</sup>* animal, whereas no  
153 signs of engraftment were observed in the control animal. Of note, previous transplantation studies  
154 with lymphosarcoma cells in *X. laevis* have shown how infectious Mycobacteria induced granulomas  
155 were mistakenly interpreted as the engrafted tumour cells (Asfari, 1988; Asfari & Thiébaud, 1988).  
156 Therefore, we would like to state that validation of engraftment should not be solely based on  
157 histological assessment. In this study, for example, assessment of engraftment was done via endpoint  
158 histopathological analysis with an additional genotypic validation.

159 Next to mutant or genetically modified hosts, the use of irradiated zebrafish (White et al., 2008) and  
160 mouse (Milas et al., 1987) animals have assisted greatly in the cancer research field. For *Xenopus*  
161 *tropicalis* limited data is available that show the potential of using this technique prior to performing  
162 allotransplantations. We showed that irradiating froglets with a dose of 12 Gy, reduced T-cell numbers  
163 approximately 10-fold in the spleen and 20-fold in the liver. We furthermore showed this dose allowed  
164 efficient engraftment of *tp53<sup>-/-</sup>* tumour cells 3 weeks post intraperitoneal injection. Of note, using  
165 lower doses of radiation might also be sufficient to allow engraftment of host tumour cells. Goyos and  
166 colleagues (2011) showed that a 10 Gy irradiation dose already induced an inhibitory effect on  
167 thymocyte survival in *X. tropicalis*.

168 We hypothesize that engraftment success depends on multiple parameters such as tumour type,  
169 number of cells injected, injection site and incubation time in the host. Regarding the latter, it is known  
170 that repopulation of functional immune cells in irradiated animals can impair stable engraftment of  
171 tumour cells. For example, in zebrafish repopulation of myeloid, lymphoid and immune precursor cells  
172 is observed already 2 weeks after irradiating adult zebrafish with 12 Gy (Traver et al., 2004). In  
173 agreement with this finding, in another transplantation experiment with *X. tropicalis* GEXM tumour  
174 cells in 12 Gy irradiated hosts we indeed observed tumour cell clearance 5 weeks post transplantation,

175 probably due to host immune cell repopulation (manuscript in preparation). Considering this caveat,  
176 the availability of the *rag2*<sup>-/-</sup> line offers more flexibility with higher engraftment success rates even for  
177 long term experiments. We are convinced that with the generation of our novel *rag2*<sup>-/-</sup> line - and the  
178 ease with which irradiation can be performed - studies on immune surveillance and tumour immunity  
179 will be significantly aided.

180

## 181 **Material and Methods**

### 182 **CRISPR/Cas9 mediated generation of mosaic mutant *X. tropicalis* animals**

183 The CRISPRScan software package (Moreno-Mateos et al., 2015) was used for the design of the *rag2*  
184 CRISPR sgRNA. A 5'-gaattaatagactcactataggGTCTCCCTCCATGAATGgttttagagctagaaatagc-3' oligo  
185 along with the reverse oligo: 5'-  
186 aaaagcaccgactcgggtgccacttttcaagttgataacggactagcctattttaacttctatttctagctctaaaac-3' were ordered  
187 (Integrated DNA Technologies). At first DNA was prepared by annealing of the two primers and PCR  
188 amplification. The DNA template was *in vitro* transcribed using the HiScribe™ T7 High Yield RNA  
189 Synthesis Kit (New England Biolabs). The sgRNA was subsequently isolated using the phenol-  
190 chloroform extraction/NH<sub>4</sub>OAc precipitation method (Nakayama et al., 2014). RNA quantity was  
191 calculated by Qubit® 2.0 Fluorometer (Thermo Fisher Scientific) measurement and quality was visually  
192 confirmed by agarose gel electrophoresis. A detailed guideline for generating the NLS-Cas9-NLS  
193 protein can be found in previous described work (Naert et al., 2016). After setting up natural matings  
194 resulting 2-cell stage embryos were injected unilaterally with a 1 nl pre-incubated (30 sec @ 37°C) mix  
195 of sgRNA and Cas9 protein. Gene editing efficiencies were evaluated quantitatively by targeted  
196 amplicon next-generation sequencing (as described below). The inDelphi *in silico* prediction algorithm  
197 was included to validate endogenously observed frequencies of variant calls (Shen et al., 2018).

198

### 199 **DNA extraction and sequencing**

200 Gene editing was assessed by subjecting PCR amplified sgRNA targeted regions to deep sequencing  
201 followed by BATCH-GE analysis (Boel et al., 2016). DNA, from either whole embryos (three embryo  
202 pools each containing three stage NF 41 embryos) or from dissected tumours, was isolated using DNA  
203 lysis buffer (50 mM Tris pH 8.8, 1 mM EDTA, 0.5% Tween- 20, 200 µg/mL proteinase K) during an  
204 overnight incubation (55°C) followed by a 5 min boiling step. Primers used in this study for  
205 amplification were: *rag2*<sup>fw</sup> 5'-GCTATCTGCCTCCACTTAGAC-3' and *rag2*<sup>rv</sup> 5'-  
206 AATGTCAATGGTGTATCATC-3' with an extra internal primer used for Sanger sequencing *rag2*<sup>int</sup> 5'-  
207 TCTCCTATTGACTGAAGATGCC-3', *tp53*<sup>fw</sup> 5'-CAGTGCTTATTGTTACCTCCA-3' and *tp53*<sup>rv</sup> 5'-  
208 CATGGGAAGTGTAGTCTATCAC-3'. The methodology for Sanger sequencing and correlation analysis

209 between *in vivo* versus *in vitro* CRISPR mutational repair outcome can be found in (Naert, Tulkens, et  
210 al., 2020).

211

### 212 **(Mixed) HMA genotyping method**

213 For genotyping the *rag2* line and tumour (graft) cells, WT DNA (*i.e.* DNA from non-injected frogs) was  
214 amplified in parallel with each unknown DNA sample via a standard PCR. Subsequently, equal  
215 quantities of both products – PCR amplified WT and unknown sample DNA – were mixed and  
216 eventually subjected to HMA in parallel with all the unknown samples individually (unmixed). This was  
217 completed by incubation of the samples at 98°C for 5 minutes, followed by a 4°C holding temperature  
218 using a transition with a ramp rate of 1°C/s. Finally, the PCR amplicons were prepped with DNA loading  
219 dye and run on an 8% (bis)acrylamide/TBE gel. Visualization was done on a Molecular Imager® Gel  
220 DocTM XR+ System (Bio-Rad) supported by the Image Lab software (Bio-Rad).

221

### 222 **Irradiation procedure**

223 24 hours prior transplantation, animals (early froglet stage) were sub-lethally irradiated up to 12 Gy  
224 with X-rays using the XRAD320 device (Precision X-Ray, Inc, North Branford, CT) at approximately 120  
225 cGy/min. Froglets were placed individually in 50 mL Falcon tubes filled with 25 mL filter sterilised frog  
226 water.

227

### 228 **Tumour cell transplantation**

229 Tumour single cell suspensions were prepared manually by dissecting tumour pieces, subsequently  
230 washing them with sterile amphibian phosphate buffered saline (APBS) after which they were poured  
231 through a 40 µm cell strainer (Falcon™) using tweezers to mince the tumour and APBS for flushing. An  
232 aliquoted 20 µL of single cells was mixed with 180 µL 0.1% trypan blue solution to count living cells.  
233 Subsequently, the tumour cell suspension was centrifuged for 5 min at 240 g (RT) and resuspended  
234 with APBS to the appropriate concentration. Recipient host frogs (*rag2*<sup>-/-</sup>, irradiated or WT) were  
235 sedated using a 2 g/L MS222 (Tricaine methanesulfonate) solution diluted in water and adjusted to pH  
236 7 with sodium bicarbonate. Each recipient host animal was injected intraperitoneally with a 100 µL  
237 tumour single cell suspension containing 5x10<sup>6</sup> live tumour cells for the *rag2*<sup>-/-</sup> and respective adult  
238 control recipient and 1x10<sup>7</sup> live tumour cells for the irradiated and respective control froglet recipient,  
239 using BD Micro-Fine Demi 0.3 mL Syringes 0.3 mm (30G) x 8 mm. Post transplantation, injected animals  
240 were housed separately and monitored closely for any signs of engraftment or discomfort. For all  
241 animal experiments, ethical approval was obtained and guidelines set out by the ethical committee  
242 were followed.

243

244 **Blood counts**

245 Peripheral blood or intraperitoneal fluid was isolated by cardiac puncture or intraperitoneal (IP) lavage,  
246 respectively. For the IP lavage, a small incision was made in the skin of the belly and the abdominal  
247 muscle wall after which 100  $\mu$ l APBS was used for rinsing the IP cavity. Approximately 10  $\mu$ l IP fluid cells  
248 diluted in APBS was collected for further processing. Immediately after collection, cells were diluted  
249 1:50 in Natt and Herrick reagent, a methyl violet based staining solution, for downstream counting  
250 analysis (Maxham et al., 2016; Natt & Herrick, 1952). Counts were performed using a Buerker  
251 hemocytometer (Marienfeld). For each Natt and Herrick sample at least 2x6 regions were counted  
252 (minimum 150 cells per count).

253

254 **Imaging, histology and immunohistochemistry**

255 Animals were euthanized by lethal incubation in a Benzocaine solution (500 mg/L) until heart beating  
256 stopped. Macroscopic images were taken with a Carl Zeiss StereoLUMAR.V12 stereomicroscope.  
257 Dissected organs or tumours were fixed overnight in 4% PFA at 4°C and subsequently dehydrated and  
258 paraffinized. Organ slices (5  $\mu$ m) were generated by microtomy and stained with haematoxylin and  
259 eosin using the Varistain™ 24-4 Automatic Slide Stainer (Thermo-Scientific) for classical histological  
260 assessment. For immunohistochemistry (IHC) experiments following primary antibodies were used:  
261 IgG anti-human CD3 antibody (1:200, clone CD3-12, Bio-Rad) and anti-PCNA antibody (1:1000, PC10,  
262 Dako). Following secondary antibodies (all 1:500) were used: Biotinylated Goat Anti-Rat Ig (559286, BD  
263 Pharmingen) and Biotinylated Goat Anti-Mouse Ig (E0433, DAKO). DAB was used as chromogenic  
264 method of detection and signal was developed using the VECTASTAIN Elite ABC HRP Kit (PK-6100;  
265 Vector laboratories) combined with ImmPACT DAB Peroxidase (SK-4105; Vector laboratories). Finally,  
266 samples were counterstained with haematoxylin. All IHC experiments included 'no primary antibody'  
267 controls (data not shown). Imaging of sections was performed by using an Olympus BX51 Discussion  
268 Microscope. For quantification of CD3 stained slides, the QuPath software tool (Bankhead et al., 2017)  
269 was used. Slides were acquired using the ZEISS Axioscan 7 machine at 20x magnification with a  
270 resolution of 0.22  $\mu$ m/pixel.

271

272 **Statistical analysis**

273 Comparisons and conclusions between experimental and wild type groups were statistically supported  
274 by two-sided student's t-tests (non-significant  $p \geq 0.05$ , \* $p < 0.05$ , \*\* $p < 0.01$ , \*\*\* $p < 0.001$ , \*\*\*\* $p <$   
275 0.0001). Bar charts shown represent means with SD as error bar.

276

277 **Competing interests**

278 The authors declare no competing interests.



279

280 **Contributions**

281 D.T., P.V.V. and K.V. designed the study. D.T., D.D., M.B., T.V.N. and S.D. were involved in the  
282 generation and validation of the *rag2*<sup>-/-</sup> line. D.T. and W.T. performed the irradiation procedure. D.T.  
283 and K.V. performed all transplantations. D.C. performed histopathological validation of the tissue  
284 sections. D.T. & K.V. wrote the manuscript.

285

286 **Acknowledgements**

287 D.T. holds a PhD fellowship from the Research Foundation—Flanders (FWO-Vlaanderen). Research in  
288 the authors' laboratory is supported by the Research Foundation – Flanders (FWO-Vlaanderen) (grants  
289 GOA1515N and G029413N) and by the Concerted Research Actions from Ghent University  
290 (BOF15/GOA/011 and BOF20/GOA/023). Further support was obtained by the Hercules Foundation,  
291 Flanders (grant AUGE/11/14), the Desmoid Tumor Research Foundation, the Desmoid Tumour  
292 Foundation of Canada and SOS Desmoïde. In addition, the authors would like to thank Marjolein Carron  
293 and Annekatrien Boel for processing the next-generation sequencing data via the BATCH-GE software.  
294 We would like to acknowledge Amanda Gonçalves and Benjamin Pavie (VIB Bioimaging Core) for  
295 generating the QuPath script for positive cell detection. Furthermore, we are thankful to Tim  
296 Deceuninck for the good animal care. Finally, we would like to thank Joeri Tulkens for critical proof-  
297 reading of the manuscript.

298

299 **References**

- 300 Asfari, M. (1988). Mycobacterium-induced Infectious Granuloma in *Xenopus*: Histopathology and  
301 Transmissibility. *Cancer Research*, 48(4).
- 302 Asfari, M., & Thiébaud, C. H. (1988). Transplantation Studies of a Putative Lymphosarcoma of  
303 *Xenopus*. *Cancer Research*, 48(4).
- 304 Banach, M., & Robert, J. (2017). Tumor Immunology Viewed from Alternative Animal Models—the  
305 *Xenopus* Story. In *Current Pathobiology Reports* (Vol. 5, Issue 1, pp. 49–56). Springer.  
306 <https://doi.org/10.1007/s40139-017-0125-y>
- 307 Bankhead, P., Loughrey, M. B., Fernández, J. A., Dombrowski, Y., McArt, D. G., Dunne, P. D., McQuaid,  
308 S., Gray, R. T., Murray, L. J., Coleman, H. G., James, J. A., Salto-Tellez, M., & Hamilton, P. W.  
309 (2017). QuPath: Open source software for digital pathology image analysis. *Scientific Reports*  
310 2017 7:1, 7(1), 1–7. <https://doi.org/10.1038/s41598-017-17204-5>
- 311 Boel, A., Steyaert, W., De Rocker, N., Menten, B., Callewaert, B., De Paepe, A., Coucke, P., & Willaert,  
312 A. (2016). BATCH-GE: Batch analysis of Next-Generation Sequencing data for genome editing  
313 assessment. *Scientific Reports*, 6(1), 30330. <https://doi.org/10.1038/srep30330>
- 314 Dunn, G. P., Bruce, A. T., Ikeda, H., Old, L. J., & Schreiber, R. D. (2002). Cancer immunoediting: from  
315 immunosurveillance to tumor escape. *Nature Immunology* 2002 3:11, 3(11), 991–998.  
316 <https://doi.org/10.1038/ni1102-991>
- 317 Foster, S. D., Glover, S. R., Turner, A. N., Chatti, K., & Challa, A. K. (2019). A mixing heteroduplex  
318 mobility assay (mHMA) to genotype homozygous mutants with small indels generated by  
319 CRISPR-Cas9 nucleases. *MethodsX*, 6, 1. <https://doi.org/10.1016/J.MEX.2018.11.017>
- 320 Gansner, J. M., Dang, M., Ammerman, M., & Zon, L. I. (2017). Transplantation in zebrafish. *Methods*  
321 *in Cell Biology*, 138, 629–647. <https://doi.org/10.1016/BS.MCB.2016.08.006>
- 322 Goyos, A., Sowa, J., Ohta, Y., & Robert, J. (2011). Remarkable Conservation of Distinct Nonclassical  
323 MHC Class I Lineages in Divergent Amphibian Species. *The Journal of Immunology*, 186(1), 372–  
324 381. <https://doi.org/10.4049/JIMMUNOL.1001467>
- 325 Greene, H. S. N. (1938). HETEROLOGOUS TRANSPLANTATION OF HUMAN AND OTHER MAMMALIAN  
326 TUMORS. *Science*, 88(2285).
- 327 Maxham, L. A., Forzán, M. J., Hogan, N. S., Vanderstichel, R. V., & Gilroy, C. V. (2016). Hematologic  
328 reference intervals for *Xenopus tropicalis* with partial use of automatic counting methods and  
329 reliability of long-term stored samples. *Veterinary Clinical Pathology*, 45(2), 291–299.  
330 <https://doi.org/10.1111/vcp.12362>
- 331 Milas, L., Hunter, N., & Peters, L. (1987). The tumor bed effect: dependence of tumor take, growth  
332 rate, and metastasis on the time interval between irradiation and tumor cell transplantation.

- 333 *International Journal of Radiation Oncology, Biology, Physics*, 13(3), 379–383.  
334 [https://doi.org/10.1016/0360-3016\(87\)90012-5](https://doi.org/10.1016/0360-3016(87)90012-5)
- 335 Moreno-Mateos, M. A., Vejnar, C. E., Beaudoin, J.-D., Fernandez, J. P., Mis, E. K., Khokha, M. K., &  
336 Giraldez, A. J. (2015). CRISPRscan: designing highly efficient sgRNAs for CRISPR-Cas9 targeting in  
337 vivo. *Nature Methods*, 12(10), 982–988. <https://doi.org/10.1038/nmeth.3543>
- 338 Naert, T., Colpaert, R., Van Nieuwenhuysen, T., Dimitrakopoulou, D., Leoen, J., Haustraete, J., Boel,  
339 A., Steyaert, W., Lepez, T., Deforce, D., Willaert, A., Creytens, D., & Vleminckx, K. (2016).  
340 CRISPR/Cas9 mediated knockout of rb1 and rbl1 leads to rapid and penetrant retinoblastoma  
341 development in *Xenopus tropicalis*. *Scientific Reports*, 6(1), 35264.  
342 <https://doi.org/10.1038/srep35264>
- 343 Naert, T., Dimitrakopoulou, D., Tulkens, D., Demuynck, S., Carron, M., Noelanders, R., Eeckhout, L.,  
344 Van Isterdael, G., Deforce, D., Vanhove, C., Van Dorpe, J., Creytens, D., & Vleminckx, K. (2020).  
345 RBL1 (p107) functions as tumor suppressor in glioblastoma and small-cell pancreatic  
346 neuroendocrine carcinoma in *Xenopus tropicalis*. *Oncogene* 2020 39:13, 39(13), 2692–2706.  
347 <https://doi.org/10.1038/s41388-020-1173-z>
- 348 Naert, T., Tulkens, D., Edwards, N. A., Carron, M., Shaidani, N.-I., Wlizla, M., Boel, A., Demuynck, S.,  
349 Horb, M. E., Coucke, P., Willaert, A., Zorn, A. M., & Vleminckx, K. (2020). Maximizing  
350 CRISPR/Cas9 phenotype penetrance applying predictive modeling of editing outcomes in  
351 *Xenopus* and zebrafish embryos. *Scientific Reports* 2020 10:1, 10(1), 1–12.  
352 <https://doi.org/10.1038/s41598-020-71412-0>
- 353 Nakayama, T., Blitz, I. L., Fish, M. B., Odeleye, A. O., Manohar, S., Cho, K. W. Y., & Grainger, R. M.  
354 (2014). Cas9-Based Genome Editing in *Xenopus tropicalis*. *The Use of CRISPR/Cas9, ZFNs,*  
355 *TALENs in Generating Site Specific Genome Alterations*, 546, 355–375.  
356 <https://doi.org/10.1016/B978-0-12-801185-0.00017-9>
- 357 Natt, M. P., & Herrick, C. A. (1952). A New Blood Diluent for Counting the Erythrocytes and  
358 Leucocytes of the Chicken. *Poultry Science*, 31(4), 735–738. <https://doi.org/10.3382/ps.0310735>
- 359 Rau, L., Cohen, N., & Robert, J. (2001). MHC-restricted and -unrestricted CD8 T cells: An evolutionary  
360 perspective. *Transplantation*, 72(11), 1830–1835. [https://doi.org/10.1097/00007890-](https://doi.org/10.1097/00007890-200112150-00020)  
361 [200112150-00020](https://doi.org/10.1097/00007890-200112150-00020)
- 362 Robert, J., Guiet, C., Cohen, N., & Pasquier, L. Du. (1997). Effects of thymectomy and tolerance  
363 induction on tumor immunity in adult *Xenopus laevis*. *International Journal of Cancer*, 70(3),  
364 330–334. [https://doi.org/10.1002/\(SICI\)1097-0215\(19970127\)70:3<330::AID-IJC14>3.0.CO;2-J](https://doi.org/10.1002/(SICI)1097-0215(19970127)70:3<330::AID-IJC14>3.0.CO;2-J)
- 365 Robert, J., Guiet, C., & du Pasquier, L. (1995). Ontogeny of the alloimmune response against a  
366 transplanted tumor in *Xenopus laevis*. *Differentiation*, 59(3), 135–144.  
367 <https://doi.org/10.1046/j.1432-0436.1995.5930135.x>

- 368 Rollins-Smith, L. A., & Robert, J. (2019). Lymphocyte Deficiency Induced by Sublethal Irradiation in  
369 *Xenopus*. *Cold Spring Harbor Protocols*, 2019(1), pdb.prot097626.  
370 <https://doi.org/10.1101/PDB.PROT097626>
- 371 Sharkey, F., & Fogh, J. (1984). Considerations in the use of nude mice for cancer research. *Cancer*  
372 *Metastasis Reviews*, 3(4), 341–360. <https://doi.org/10.1007/BF00051459>
- 373 Shen, M. W., Arbab, M., Hsu, J. Y., Worstell, D., Culbertson, S. J., Krabbe, O., Cassa, C. A., Liu, D. R.,  
374 Gifford, D. K., & Sherwood, R. I. (2018). Predictable and precise template-free CRISPR editing of  
375 pathogenic variants. *Nature* 2018 563:7733, 563(7733), 646–651.  
376 <https://doi.org/10.1038/s41586-018-0686-x>
- 377 Smith, A. C. H., Raimondi, A. R., Salthouse, C. D., Ignatius, M. S., Blackburn, J. S., Mizgirev, I. V., Storer,  
378 N. Y., de Jong, J. L. O., Chen, A. T., Zhou, Y., Revskoy, S., Zon, L. I., & Langenau, D. M. (2010).  
379 High-throughput cell transplantation establishes that tumor-initiating cells are abundant in  
380 zebrafish T-cell acute lymphoblastic leukemia. *Blood*, 115(16), 3296–3303.  
381 <https://doi.org/10.1182/blood-2009-10-246488>
- 382 Tang, Q., Abdelfattah, N. S., Blackburn, J. S., Moore, J. C., Martinez, S. A., Moore, F. E., Lobbardi, R.,  
383 Tenente, I. M., Ignatius, M. S., Berman, J. N., Liwski, R. S., Houvras, Y., & Langenau, D. M. (2014).  
384 Optimized cell transplantation using adult rag2 mutant zebrafish. *Nature Methods*, 11(8), 821–  
385 824. <https://doi.org/10.1038/nmeth.3031>
- 386 Traver, D., Winzeler, A., Stern, H. M., Mayhall, E. A., Langenau, D. M., Kutok, J. L., Look, A. T., & Zon,  
387 L. I. (2004). Effects of lethal irradiation in zebrafish and rescue by hematopoietic cell  
388 transplantation. *Blood*, 104(5), 1298–1305. <https://doi.org/10.1182/BLOOD-2004-01-0100>
- 389 White, R. M., Sessa, A., Burke, C., Bowman, T., LeBlanc, J., Ceol, C., Bourque, C., Dovey, M., Goessling,  
390 W., Burns, C. E., & Zon, L. I. (2008). Transparent adult zebrafish as a tool for in vivo  
391 transplantation analysis. *Cell Stem Cell*, 2(2), 183. <https://doi.org/10.1016/J.STEM.2007.11.002>
- 392 Yan, C., Do, D., Yang, Q., Brunson, D. C., JF, R., & Langenau, D. M. (2020). Single cell imaging of human  
393 cancer xenografts using adult immune-deficient zebrafish. *Nature Protocols*, 15(9), 3105.  
394 <https://doi.org/10.1038/S41596-020-0372-Y>
- 395 Yoshida, G. J. (2020). Applications of patient-derived tumor xenograft models and tumor organoids.  
396 *Journal of Hematology & Oncology* 2020 13:1, 13(1), 1–16. [https://doi.org/10.1186/S13045-](https://doi.org/10.1186/S13045-019-0829-Z)  
397 019-0829-Z
- 398
- 399

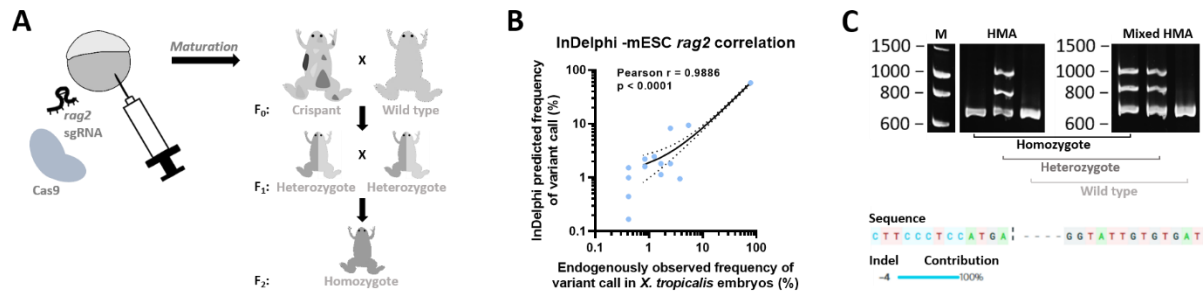

400

401 **Figure 1. Generation of the *X. tropicalis rag2*<sup>-/-</sup> knock-out line. (A)** Embryos were injected with an  
402 sgRNA targeting the *rag2* gene along with Cas9 protein. When sexually mature, animals were  
403 outcrossed to wild types to obtain heterozygous animals that were subsequently incrossed to obtain  
404 *rag2* homozygous mutant animals in the F<sub>2</sub> generation. **(B)** Scatter plot showing correlation between  
405 *in vivo* observed mutational CRISPR repair outcomes in injected embryos (x-axis) versus predicted  
406 outcomes using the inDelphi algorithm tool (y-axis). Dashed lines show the 95% confidence interval  
407 corresponding to the best-fit linear regression line (solid line). **(C)** Images taken from DNA  
408 electrophoresis gels after performing a normal HMA (left) and mixed HMA (right). Normal HMA  
409 included heating of the unknown PCR amplicons followed by slowly cooling and loading on the gel,  
410 while for mixed HMA, unknown PCR samples were first mixed with wild type *rag2* amplicons after  
411 which the normal HMA was performed. Multiple bands present in both gels indicate heterozygous  
412 animals, while extra bands appearing after performing the mixed HMA (right gel) relate to homozygous  
413 mutant animals. Absence of any extra bands is indicative of wild type animals.

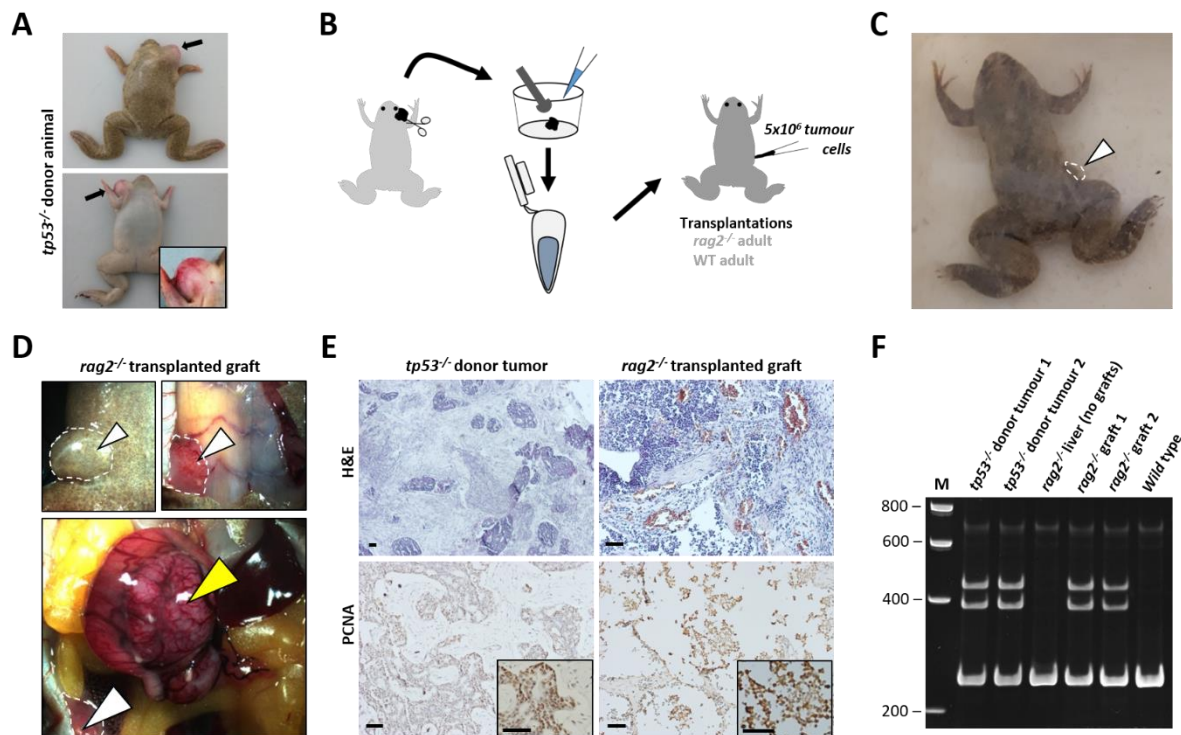

414  
 415 **Figure 2.** Validation of allografting in *X. tropicalis rag2<sup>-/-</sup>* animals. **(A)** *tp53<sup>-/-</sup>* donor animal harbouring a  
 416 thymic tumour (black arrows). **(B)** Transplantation strategy including single cell generation using a 40  
 417 µm strainer followed by IP injections in a *rag2<sup>-/-</sup>* adult and a wild type adult control (both  $5 \times 10^6$  live  
 418 cells). **(C)** A *rag2<sup>-/-</sup>* transplanted animal with visual subcutaneous outgrowth close to the injection site  
 419 (white arrow, white dashed line) 10 weeks post-transplantation. **(D)** Dissection microscopy images  
 420 (ventral view) of *rag2<sup>-/-</sup>* transplanted animal showing external (top left) and internal (top right &  
 421 bottom) views of the engrafted tumour at the injection site (white arrowheads, white dashed line)  
 422 with an additional tumour mass in the intestinal mesenterium (yellow arrowhead). **(E)** H&E and IHC  
 423 stained sections from primary tumour in *tp53<sup>-/-</sup>* donor animal and the tumour graft in the *rag2<sup>-/-</sup>* animal  
 424 transplanted with the *tp53<sup>-/-</sup>* tumour cells. **(F)** DNA electrophoresis gel image after performing a mixed  
 425 HMA (for *tp53* gene) on DNA from two *tp53<sup>-/-</sup>* tumour samples (donor animal), liver (without grafts)  
 426 and two tumour grafts obtained from the transplanted *rag2<sup>-/-</sup>* animal and finally DNA from a tumour  
 427 cell transplanted wild type animal. All scale bars are 50 µm.

428

429

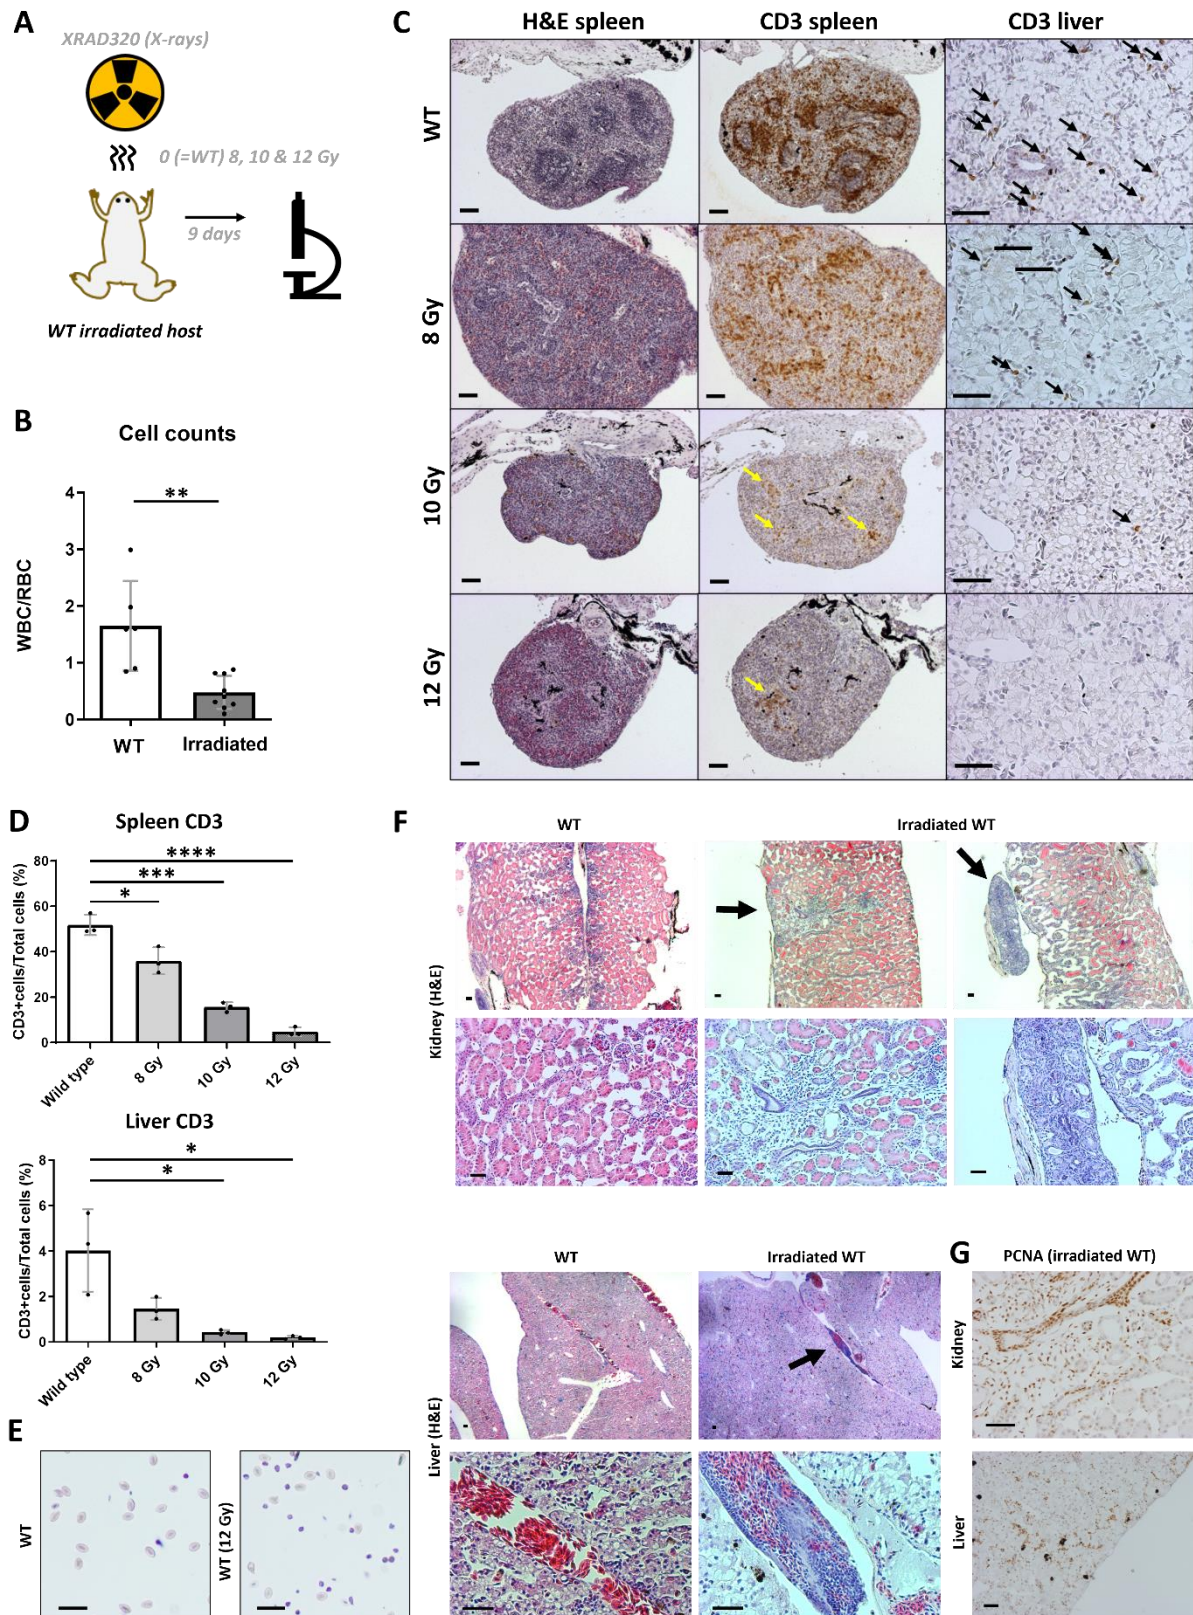

430

431 **Figure 3. Allografting in irradiated wild type *X. tropicalis* animals. (A)** Representation of the irradiation  
 432 procedure for which 3 groups (each n=3) were irradiated with X-rays (8, 10 and 12 Gy) and compared  
 433 to a non-irradiated wild type group (n=6). (B) Plots showing hemocytometer cell counts as represented  
 434 by white blood cell (WBC)/red blood cell (RBC) ratios of irradiated animals and non-irradiated controls.

435 **(C)** H&E and anti-CD3 immunostained sections from spleens and livers of all 4 groups. Yellow arrows  
436 show CD3 positive zones in the spleen, black arrows show CD3 positive cells in the liver. **(D)** IHC  
437 quantified CD3 data of spleens and livers using the open source digital analysis tool QuPath (Bankhead  
438 et al., 2017). **(E)** IP fluid from transplanted irradiated animal and non-irradiated control stained with  
439 Natt and Herrick reagent. **(F)** H&E Sections of engrafted regions in kidney and liver from transplanted  
440 irradiated froglet (black arrows) compared to respective kidney and liver sections in the transplanted  
441 non-irradiated control froglet. **(G)** PCNA-stained sections from irradiated transplant showing kidney  
442 and liver engraftment sites. All scale bars are 50  $\mu\text{m}$ . Bar charts shown represent means with SD as  
443 error bar.
